# Supplementary material for: Splice-specific deficiency of the PTSD-associated gene PAC1 leads to a paradoxical age-dependent stress behavior
Source: PubMed Central journal article supplement (PMC7292827; doi:10.1038/s41598-020-66447-2), 2020-06-12
Supplement: 41598_2020_66447_MOESM1_ESM.pdf [file 41598_2020_66447_MOESM1_ESM.pdf]

***Supplementary Information:***

**Splice-specific deficiency of the PTSD-associated gene PAC1 leads to a paradoxical age-dependent stress behavior**

Jakob Biran<sup>1\*</sup>, Michael Gliksberg<sup>2</sup>, Ido Shirat<sup>2</sup>, Amrutha Swaminathan<sup>2</sup>, Talia Levitas-Djerbi<sup>3</sup>, Lior Appelbaum<sup>3</sup> and Gil Levkowitz<sup>2\*</sup>

Department of Poultry and Aquaculture<sup>1</sup>, Agricultural Research Organization, Rishon Letziyon 7528809, Israel.

Department of Molecular Cell Biology<sup>2</sup>, Weizmann Institute of Science, PO Box 26, Rehovot 7610001, Israel

The Faculty of Life Sciences and the Multidisciplinary Brain Research Center<sup>3</sup>, Bar-Ilan University, Ramat-Gan 5290002, Israel

\*Correspondence should be addressed to

J.B. [jakob@volcani.agri.gov.il](mailto:jakob@volcani.agri.gov.il)

G.L. [gil.levkowitz@weizmann.ac.il](mailto:gil.levkowitz@weizmann.ac.il)

Running title: Stress modulation by PAC1 splice isoform

Key words: adcyap1r1, gpcr, adcyap1, hypothalamus, stress, post-traumatic stress disorder, alternative splicing

## Supplementary Figures

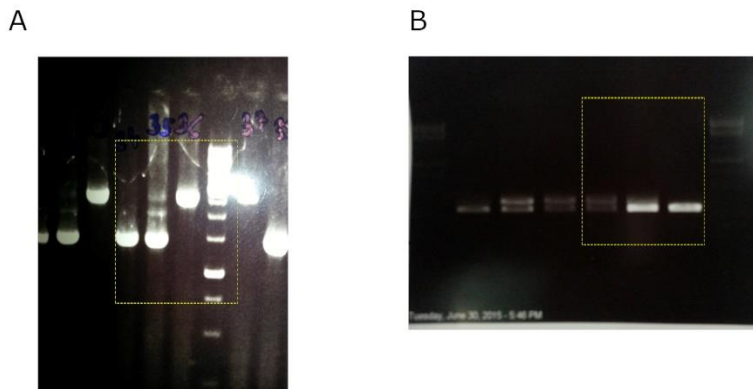

**Supplementary Figure 1.** Full length electrophoresis gel images of genomic DNA (A) and cDNA (B) in Figure 1. Images were cropped to the yellow dashed rectangle and color inverted.

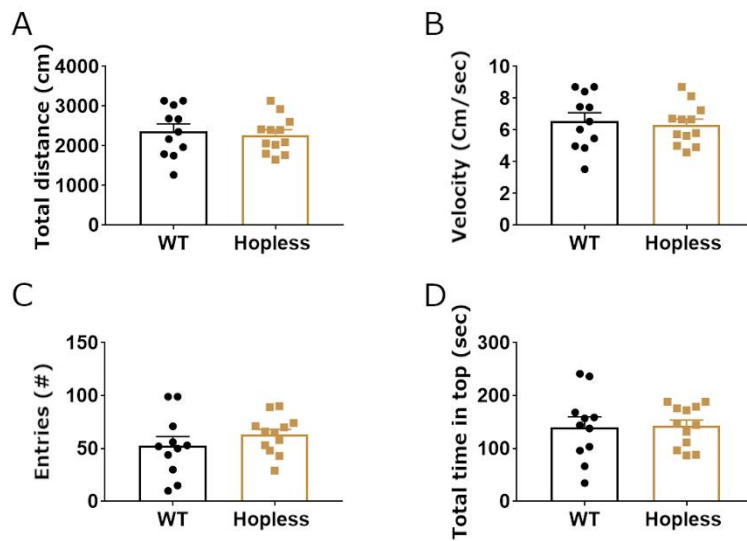

**Supplementary Figure 2.** Naïve *hopless* adults display normal behavior in novel tank diving assay. The behavioral response of adult *hopless* mutants (n=12) and WT siblings (n=11) to a novel tank was measured. The two genotypes exhibited a similar activity level, as seen in their total swimming distance swum and average swimming velocity during the 10 min test (A and B). Both genotypes displayed similar exploration of the top half of the tank (C and D). Data was analyzed using students-t test.

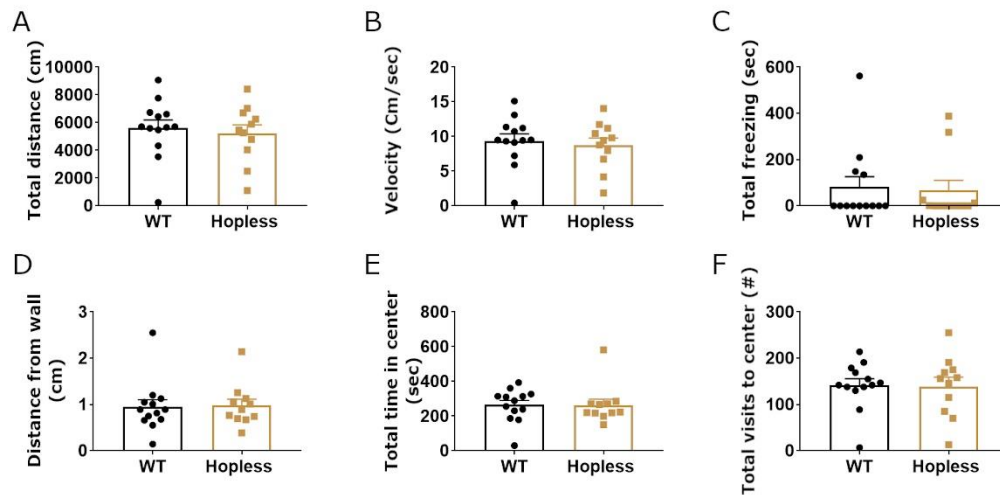

**Supplementary Figure 3. Naïve adult *hopless* mutants display normal behavior in the open field assay.** The behavioral response of adult *hopless* mutants (n=11) and WT siblings (n=13) in a novel open field arena was measured. Similarly to the novel tank diving assay, the two genotypes exhibited a similar activity level, as seen in their mean swimming distance and velocity, which significantly increased with time (A and B). In addition, both genotypes displayed significantly decreased freezing, distance from walls and time spent in the center of the arena along the test (C-E) and a slight but significant increase in their visits to the center (F), suggesting increased exploration activity over time. Data were analyzed using Student’s *t*-test.

**Supplementary Table 1. Oligonucleotides used for gRNA transcription and RT-PCRs**

| Primer               | Sequence                                                                       | Length (nt) |
|----------------------|--------------------------------------------------------------------------------|-------------|
| Hop genotyping 1F    | CAAAGGTTGTTGGCGTCATA                                                           | 20          |
| Hop genotyping 2697R | ATTCCCCACGTTTGTCTCAG                                                           | 20          |
| Upstream hop gDNA    | ATTTAGGTGACACTATAGTGTGAAAAGGAACAGTGTGTGTTTTAGAGCTAGAAATAGCAAG                  | 60          |
| Downstream hop gDNA  | ATTTAGGTGACACTATATGGTGTGGACATTAAGGAGGTTTTAGAGCTAGAAATAGCAAG                    | 60          |
| Constant gDNA        | AAAAGCACCGACTCGGTGCCACTTTTTCAAGTTGATAACGGACTAGCCTATTTTAACTTGCTATTCTAGCTCTAAAAC | 80          |
| PAC1 cDNA – F        | TGATAAACTGCCCCTGGTG                                                            | 21          |
| PAC1 cDNA – R        | CCAGGCCGAGCTCAAAGACC                                                           | 20          |
